# Supplementary material for: A Formalized Method to Acclimate Dogs to Voluntary Treadmill Locomotion at Various Speeds and Inclines
Source: MDPI journal article supplement (doi:10.3390/ani12050567), 2022-02-24
Supplement: s1 [file s1]

## Penn Vet Working Dog Center Treadmill Acclimation Protocol

| Level | 2% (flat) treadmill incline      | 10% treadmill incline            | 20% treadmill incline            | Criteria time (sec) |
|-------|----------------------------------|----------------------------------|----------------------------------|---------------------|
| 1     | 0.5 mph (0.8 kph) - slow walk    |                                  |                                  | 5                   |
| 2     | 0.5 mph (0.8 kph) - slow walk    |                                  |                                  | 30                  |
| 3     | 1.0 mph (1.6 kph) - slow walk    |                                  |                                  | 30                  |
| 4     | 2.0 mph (3.2 kph) - walk         |                                  |                                  | 30                  |
| 5     | 3.0 mph (4.8 kph) - fast walk    |                                  |                                  | 30                  |
| 6     |                                  | 0.5 mph (0.8 kph) - slow walk    |                                  | 30                  |
| 7     |                                  | 1.0 mph (1.6 kph) - slow walk    |                                  | 30                  |
| 8     |                                  | 2.0 mph (3.2 kph) - walk         |                                  | 30                  |
| 9     |                                  | 3.0 mph (4.8 kph) - fast walk    |                                  | 30                  |
| 10    |                                  |                                  | 0.5 mph (0.8 kph) - slow walk    | 30                  |
| 11    |                                  |                                  | 1.0 mph (1.6 kph) - slow walk    | 30                  |
| 12    |                                  |                                  | 2.0 mph (3.2 kph) - walk         | 30                  |
| 13    |                                  |                                  | 3.0 mph (4.8 kph) - fast walk    | 30                  |
| 14    | 4.0 mph (6.4 kph) - slow trot    |                                  |                                  | 30                  |
| 15    |                                  | 4.0 mph (6.4 kph) - slow trot    |                                  | 30                  |
| 16    |                                  |                                  | 4.0 mph (6.4 kph) - slow trot    | 30                  |
| 17    | 5.0 mph (8.0 kph) - trot         |                                  |                                  | 30                  |
| 18    | 6.0 mph (9.7 kph) - fast trot    |                                  |                                  | 30                  |
| 19    | 7.0 mph (11.3 kph) - slow canter |                                  |                                  | 30                  |
| 20    |                                  | 5.0 mph (8.0 kph) - trot         |                                  | 30                  |
| 21    |                                  | 6.0 mph (9.7 kph) - fast trot    |                                  | 30                  |
| 22    |                                  | 7.0 mph (11.3 kph) - slow canter |                                  | 30                  |
| 23    |                                  |                                  | 5.0 mph (8.0 kph) - trot         | 30                  |
| 24    |                                  |                                  | 6.0 mph (9.7 kph) - fast trot    | 30                  |
| 25    |                                  |                                  | 7.0 mph (11.3 kph) - slow canter | 30                  |
