# Supplementary material for: A Formalized Method to Acclimate Dogs to Voluntary Treadmill Locomotion at Various Speeds and Inclines
Source: MDPI journal article supplement (doi:10.3390/ani12050567), 2022-02-24
Supplement: s1 [file s1]

## Penn Vet Working Dog Center Endurance Soreness Assessment \_\_\_\_\_’s Soreness Record

| Date | Epaxials |         | Gluteals |         | Iliopsoas |         | Cranial thigh |         | Caudal thigh |         | Total<br>Tension<br>Score | Resistance<br>to<br>movements | Evaluator’s Initials &<br>Notes |
|------|----------|---------|----------|---------|-----------|---------|---------------|---------|--------------|---------|---------------------------|-------------------------------|---------------------------------|
|      | L        | R       | L        | R       | L         | R       | L             | R       | L            | R       |                           |                               |                                 |
|      | H 0 1 2  | H 0 1 2 | H 0 1 2  | H 0 1 2 | H 0 1 2   | H 0 1 2 | H 0 1 2       | H 0 1 2 | H 0 1 2      | H 0 1 2 |                           | P-u 8s                        |                                 |
|      | H 0 1 2  | H 0 1 2 | H 0 1 2  | H 0 1 2 | H 0 1 2   | H 0 1 2 | H 0 1 2       | H 0 1 2 | H 0 1 2      | H 0 1 2 |                           | P-u 8s                        |                                 |
|      | H 0 1 2  | H 0 1 2 | H 0 1 2  | H 0 1 2 | H 0 1 2   | H 0 1 2 | H 0 1 2       | H 0 1 2 | H 0 1 2      | H 0 1 2 |                           | P-u 8s                        |                                 |
|      | H 0 1 2  | H 0 1 2 | H 0 1 2  | H 0 1 2 | H 0 1 2   | H 0 1 2 | H 0 1 2       | H 0 1 2 | H 0 1 2      | H 0 1 2 |                           | P-u 8s                        |                                 |
|      | H 0 1 2  | H 0 1 2 | H 0 1 2  | H 0 1 2 | H 0 1 2   | H 0 1 2 | H 0 1 2       | H 0 1 2 | H 0 1 2      | H 0 1 2 |                           | P-u 8s                        |                                 |
|      | H 0 1 2  | H 0 1 2 | H 0 1 2  | H 0 1 2 | H 0 1 2   | H 0 1 2 | H 0 1 2       | H 0 1 2 | H 0 1 2      | H 0 1 2 |                           | P-u 8s                        |                                 |
|      | H 0 1 2  | H 0 1 2 | H 0 1 2  | H 0 1 2 | H 0 1 2   | H 0 1 2 | H 0 1 2       | H 0 1 2 | H 0 1 2      | H 0 1 2 |                           | P-u 8s                        |                                 |

**Abbreviations:** heat (H), Paws-up (P-u), and Figure-8s (8s)

**Signs of soreness:** resistant to perform movements, muscle tension, behavioral response to palpation, warmth

**Scoring:** 0 - no soreness, 1 - mild soreness, 2 - moderate or greater soreness

**Response:** If a soreness of 2 is identified in any area or a total score of 4 or greater, complete the PVWDC FTW Warm-up, perform a 5:00 walk or trot (as appropriate for the dog’s acclimation stage) on the treadmill with no incline, and complete the PVWDC FTW Cool-down [18].

### References

18. Farr, B.D., M.T. Ramos, and C.M. Otto, *The Penn Vet Working Dog Center Fit to Work Program: A Formalized Method for Assessing and Developing Foundational Canine Physical Fitness*. Frontiers in Veterinary Science, 2020. **7**(470).
