# Supplementary material for: A Formalized Method to Acclimate Dogs to Voluntary Treadmill Locomotion at Various Speeds and Inclines
Source: Animals (Basel). 2022 Feb 24;12(5):567. doi: 10.3390/ani12050567 (PMC8908820; doi:10.3390/ani12050567)
Supplement: Supplementary file 1 [file animals-12-00567-s001.zip]

Archive with 4 entries (4 files):
- Text S1_ Penn Vet Working Dog Center Treadmill Acclimation Protocol.pdf
- Text S2_ Penn Vet Working Dog Center Treadmill Acclimation Session Protocol.pdf
- Text S3_ Penn Vet Working Dog Center Endurance Soreness Assessment.pdf
- Text S4_ Penn Vet Working Dog Center Treadmill Acclimation Assessment.pdf
